# Supplementary material
Source: HighWire-hosted journal article supplement (https://qdcxjkg.com/highwire/filestream/129986/field_highwire_adjunct_files/0/ERJ-01485-2015_figE1.pdf)

**Figure E1**

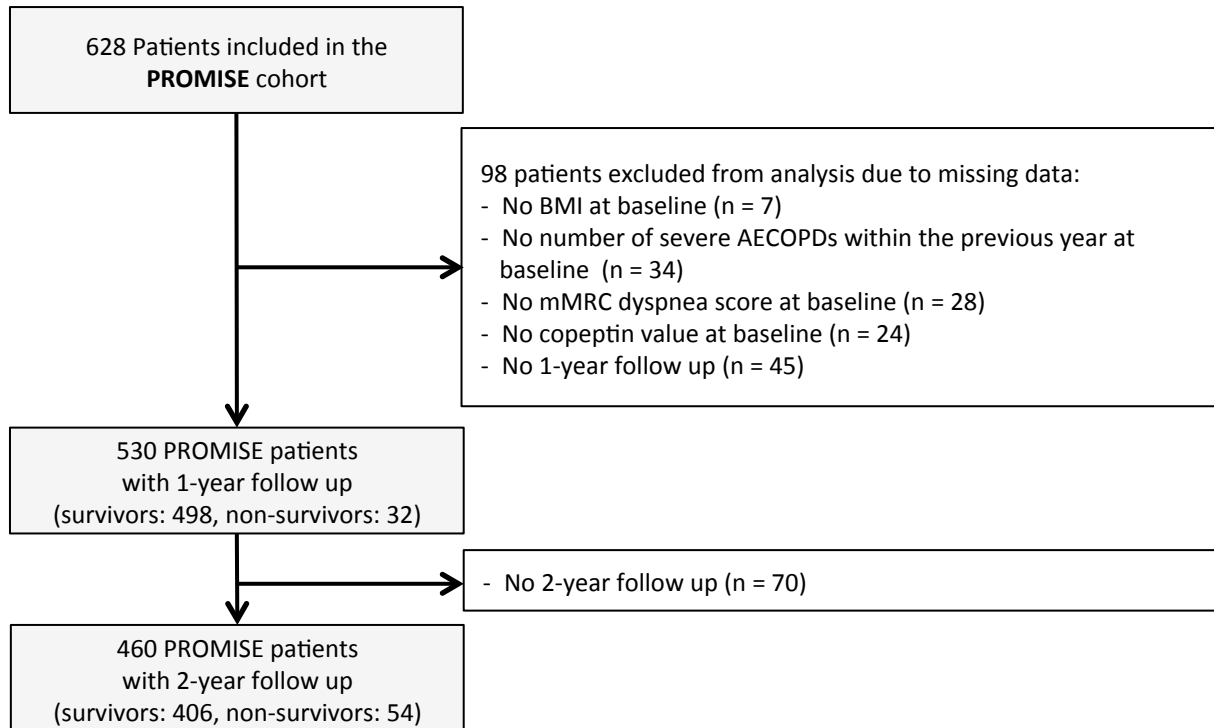

Supplement: ERJ-01485-2015_figE1.pdf [file ERJ-01485-2015_figE1.pdf]
